# Supplementary material
Source: publisher site journal article supplement (https://www.dovepress.com/get_supplementary_file.php?f=444933.docx)
Supplement: Supplementary file 1 [file get_supplementary_file.php]

**Supplemental Material**

Supplemental table 1. Determinants of QFR-defined positive functional ischemia (QFR ≤ 0.80).

|  | Univariable | | | Multivariable | | |
| --- | --- | --- | --- | --- | --- | --- |
|  | Odds ratio | 95% CI | P value | Odds ratio | 95% CI | P value |
| Age | 0.992 | 0.974-1.009 | 0.353 |  |  |  |
| Male | 0.666 | 0.359-1.234 | 0.196 |  |  |  |
| Hypertension | 1.136 | 0.723-1.784 | 0.580 |  |  |  |
| Diabetes | 1.349 | 0.653-2.788 | 0.418 |  |  |  |
| Smoking | 0.911 | 0.720-1.152 | 0.435 |  |  |  |
| Dyslipidemia | 1.410 | 0.881-2.257 | 0.152 |  |  |  |
| LVEF | 0.977 | 0.958-0.998 | 0.029 | 0.992 | 0.968-1.016 | 0.496 |
| History of MI | 0.599 | 0.230-1.561 | 0.294 |  |  |  |
| LAD lesion | 2.373 | 1.300-4.330 | 0.005 | 1.876 | 0.890-3.955 | 0.989 |
| Thrombus aspiration | 1.096 | 0.634-1.895 | 0.743 |  |  |  |
| Tirofiban use | 1.117 | 0.780-1.760 | 0.635 |  |  |  |
| MLD | 0.919 | 0.724-1.166 | 0.484 |  |  |  |
| MLA | 1.016 | 0.969-1.065 | 0.524 |  |  |  |
| DS | 1.011 | 1.001-1.021 | 0.031 | 1.005 | 0.992-1.018 | 0.450 |
| AS | 1.012 | 1.003-1.022 | 0.009 | 1.008 | 0.996-1.020 | 0.188 |
| LL | 1.027 | 0.998-1.057 | 0.066 | 1.020 | 0.986-1.056 | 0.254 |
| CFV | 1.035 | 0.997-1.071 | 0.070 | 0.932 | 0.870-0.998 | 0.044 |
| AMR | 0.982 | 0.977-0.987 | ＜0.001 | 0.979 | 0.972-0.985 | ＜0.001 |

Abbreviation: CI: confidence interval; LVEF: left ventricular ejection fraction; MI: myocardial infarction, LAD: left anterior descending coronary artery; MLD: minimal lumen diameter; MLA: minimal lumen area; DS: diameter stenosis; AS: area stenosis; LL: lesion length; CFV: coronary flow velocity; AMR: angiography-derived microcirculatory resistance.

Supplemental table 2. Comparison of post-stenting angiography indices between groups.

|  | | Concordantly negative  n=67 | Mismatch  n=68 | Reverse mismatch  n=51 | Concordantly positive  n=124 | P value |
| --- | --- | --- | --- | --- | --- | --- |
| Physiological indices | |  |  |  |  |  |
| QFR | | 0.94±0.07 | 0.94±0.04 | 0.91±0.10 | 0.92±0.06 | 0.052 |
| AMR | 300.52±106.16 | 291.95±124.71 | 251.44±76.32 | 280.75±109.94 | 0.086 | |
| CFV | 13.72±5.69 | 15.44±7.54 | 16.71±5.64 | 15.35±6.44 | 0.091 | |
| QCA analysis |  |  |  |  |  | |
| DS (%) | 20.29±14.71 | 17.24±11.50 | 19.61±13.18 | 19.94±13.18 | 0.502 | |
| AS (%) | 35.31±21.46 | 29.63±18.24 | 30.63±20.01 | 34.37±20.01 | 0.241 | |
| MLD (mm) | 2.29±0.67 | 2.52±0.54 | 2.29±0.67 | 2.46±0.61 | 0.057 | |
| MLA (mm2) | 4.88±1.44 | 5.07±1.56 | 4.71±1.53 | 4.97±1.66 | 0.637 | |

Abbreviation: QFR: quantitative flow ratio; AMR: angiography-derived microcirculatory resistance; CFV: coronary flow velocity; DS: diameter stenosis; AS: area stenosis; MLD: minimal lumen diameter; MLA: minimal lumen area.


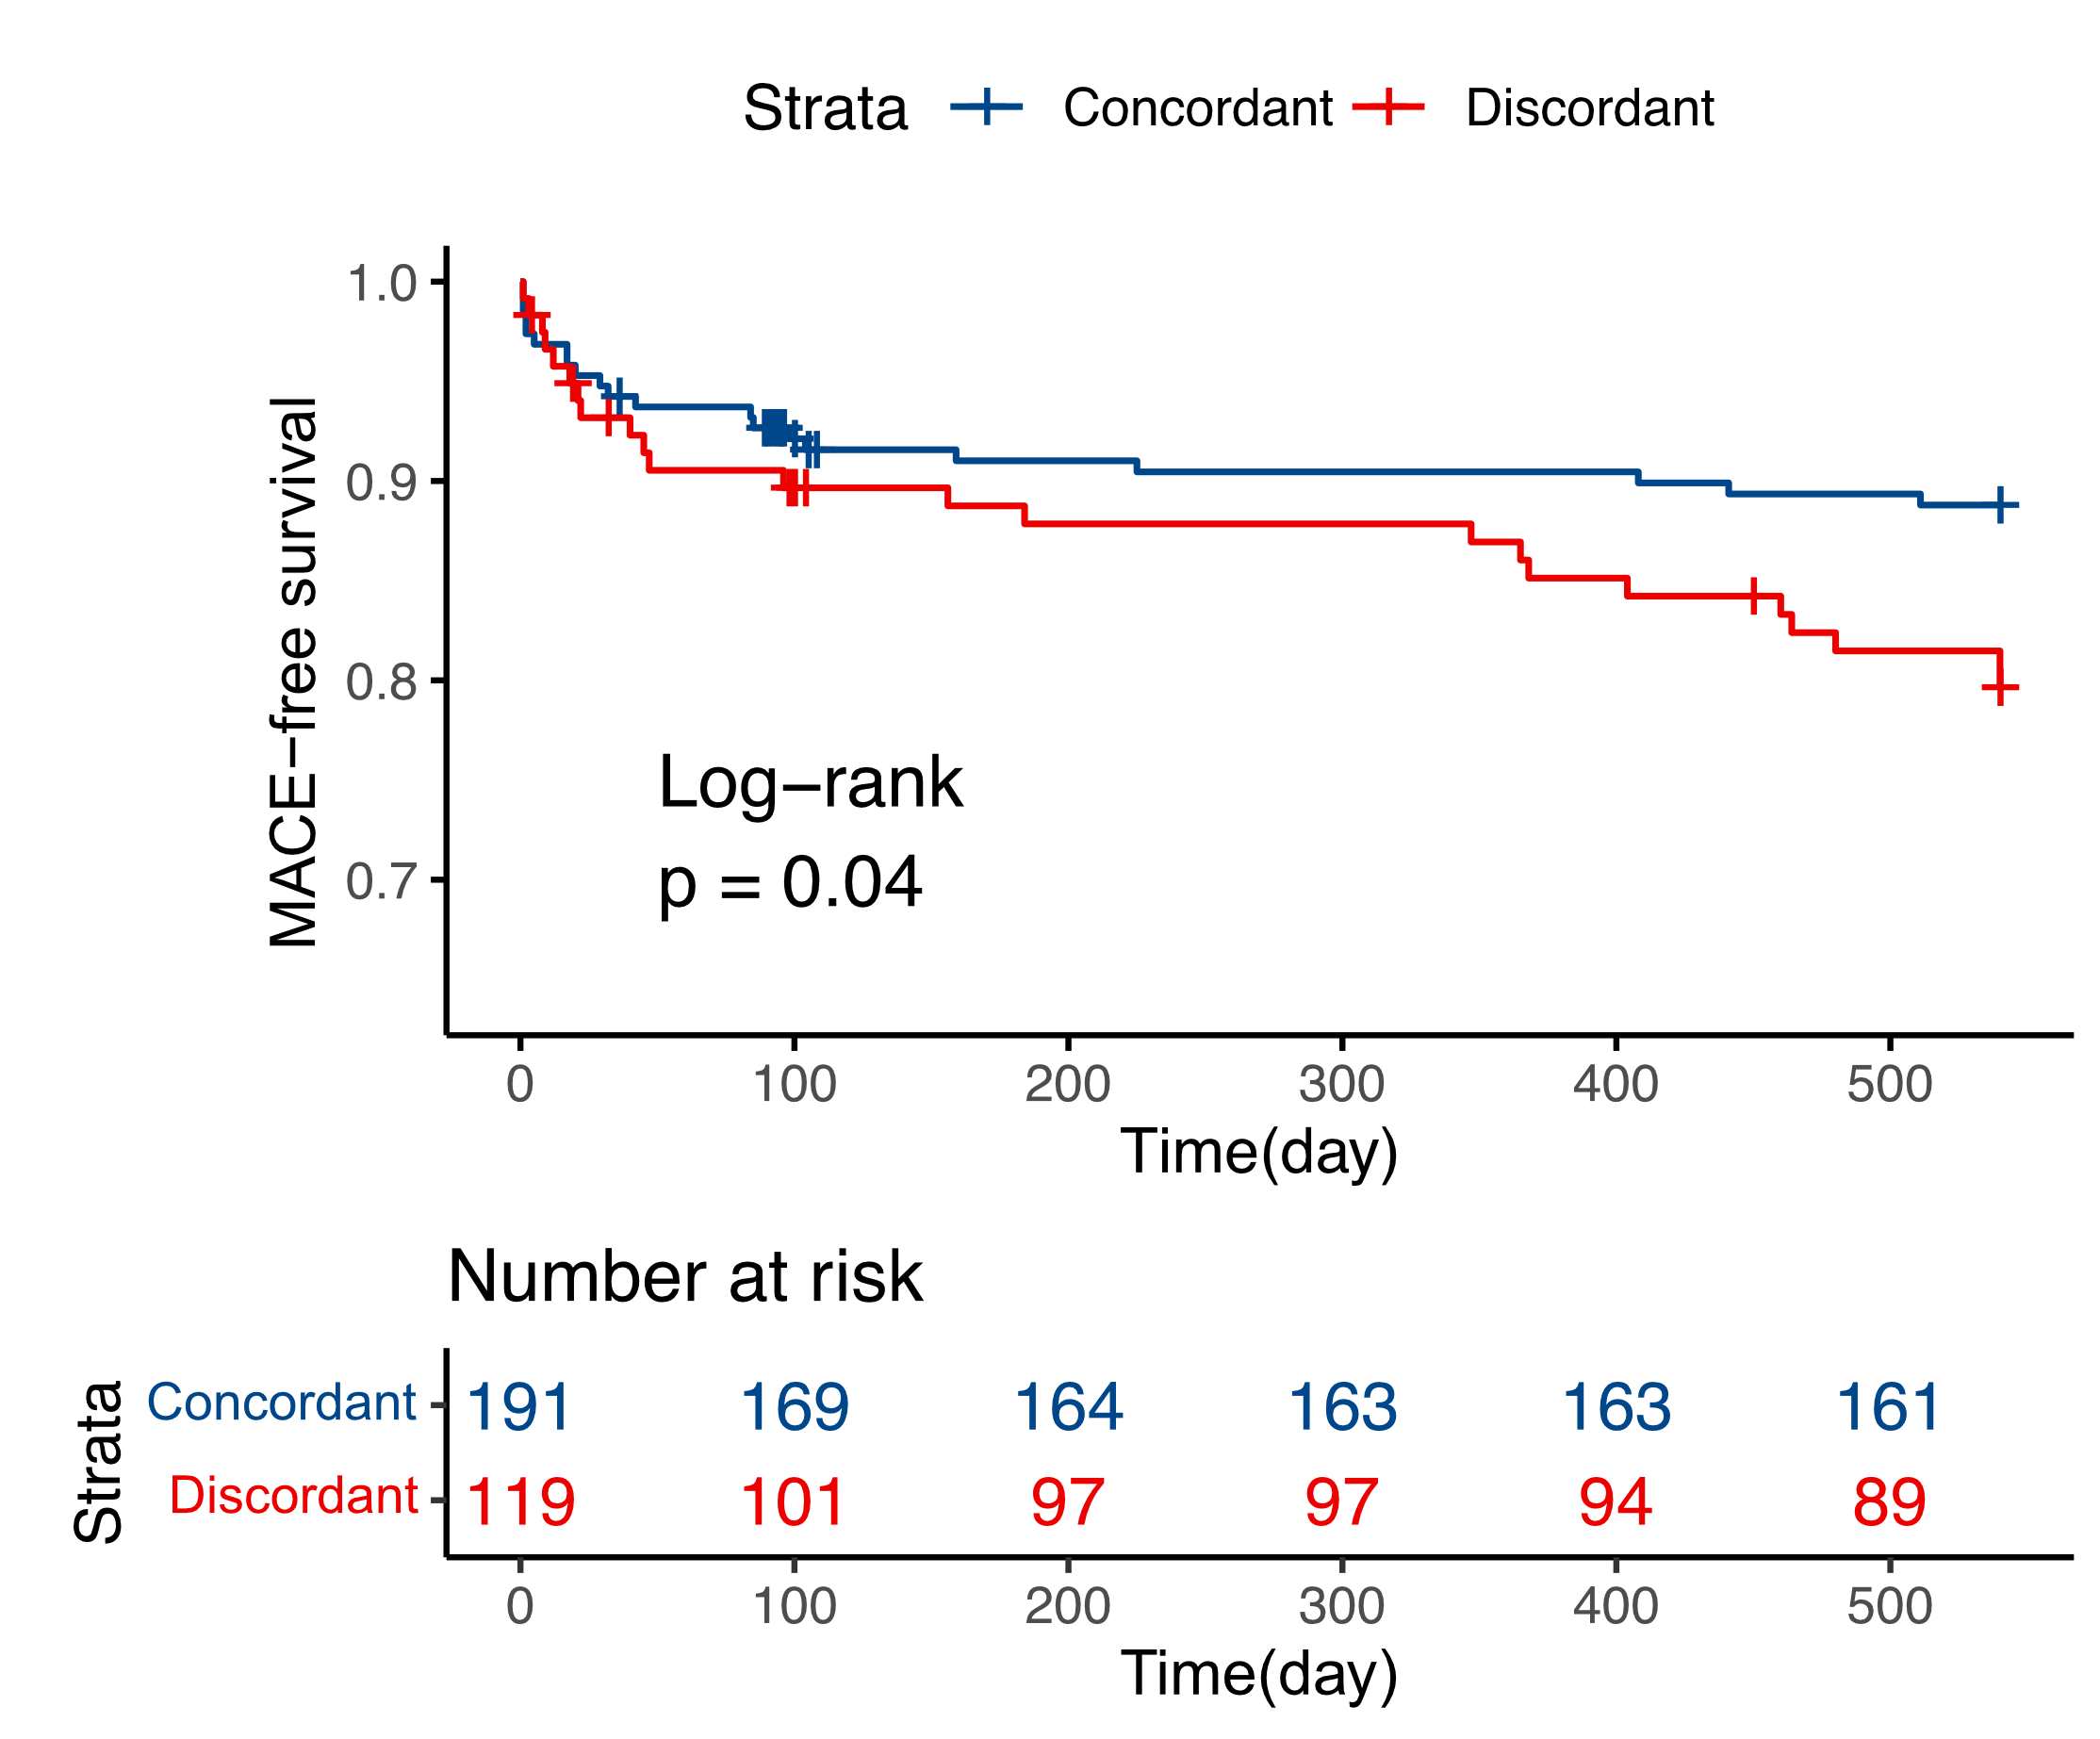


Supplemental figure 1. Kaplan–Meier curves for 18-month MACE-free survival between concordant and discordant QCA-QFR.
